# Supplementary material for: Low-temperature, solution-deposited metal chalcogenide films as highly efficient counter electrodes for sensitized solar cells
Source: Royal Society of Chemistry journal article supplement (doi:10.1039/c5ta00028a), 2015-01-01
Supplement: c5ta00028a1.pdf [file c5ta00028a1.pdf]

## Supporting Information

# Low-Temperature, Solution-Deposited Metal Chalcogenide Films as Highly Efficient Counter Electrodes for Sensitized Solar Cells

Feng Liu,<sup>1</sup> Jun Zhu,<sup>\*1</sup> Linhua Hu,<sup>1</sup> Bing Zhang,<sup>2</sup> Jianxi Yao,<sup>2</sup> Md. K. Nazeeruddin,<sup>3</sup> Michael Grätzel,<sup>\*3</sup> and Songyuan Dai<sup>\*1,2</sup>

<sup>1</sup>Key Laboratory of Novel Thin Film Solar Cells, Institute of Plasma Physics, Chinese Academy of Sciences, Hefei, 230031, P. R. China

<sup>2</sup>Beijing Key Laboratory of Novel Thin Film Solar Cells, State Key Laboratory of Alternate Electrical Power System with Renewable Energy Sources, North China Electric Power University, Beijing, 102206, P. R. China

<sup>3</sup>Laboratory for Photonics and Interfaces, Institute of Chemical Sciences and Engineering, School of Basic Science, Swiss Federal, Institute of Technology, CH-1015 Lausanne, Switzerland

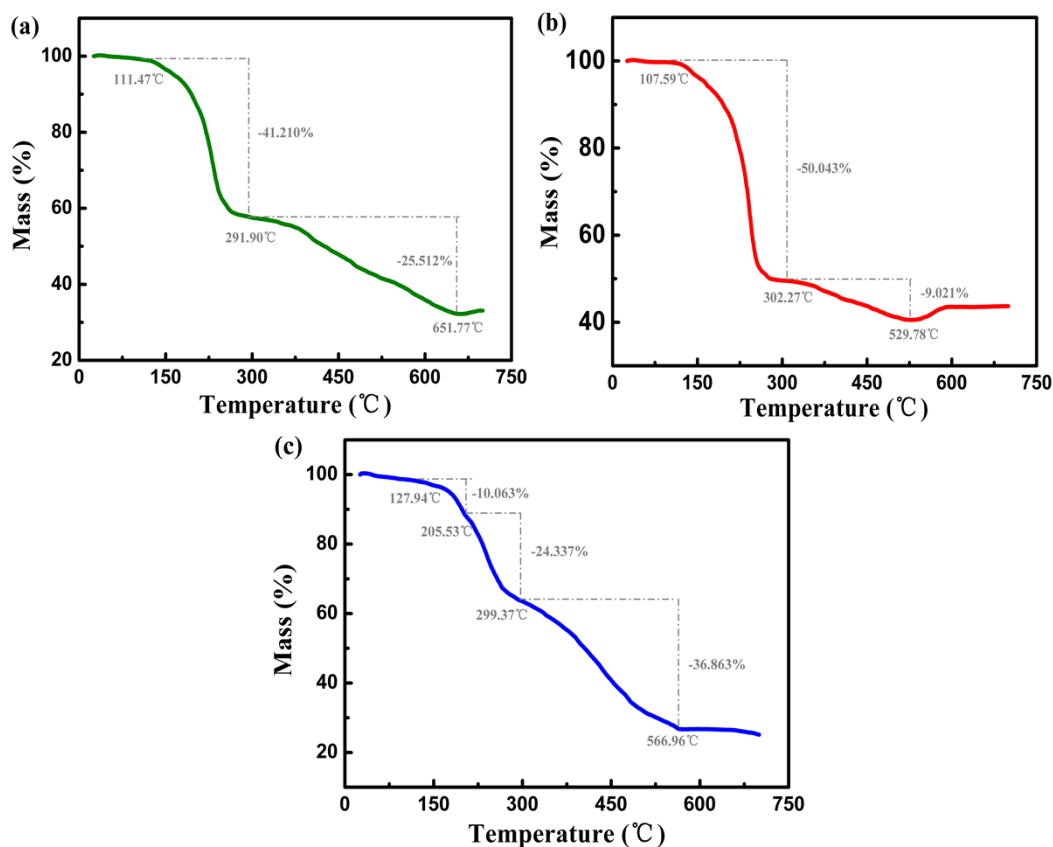

**Figure S1.** TGA curves of (a) FeSe, (b) Cu<sub>1.9</sub>S, and (c) Cu<sub>2</sub>Se solid precursors, obtained by pre-

drying solutions at 110°C for 10 min. TGA conditions: 20 mL/min nitrogen, at a heating rate of 10°C/min to 700°C.

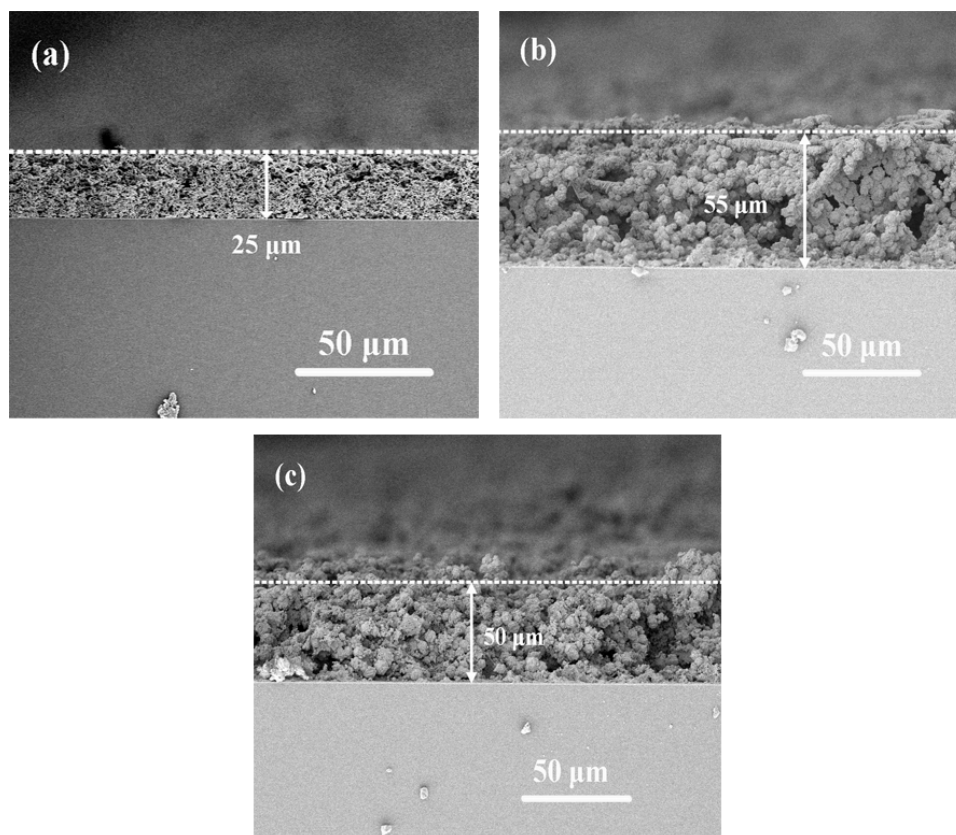

**Figure S2.** Cross-sectional SEM images of drop-cast films of (a) FeSe<sub>2</sub>, (b) Cu<sub>1.8</sub>S, and (c) CuSe on FTO glass.

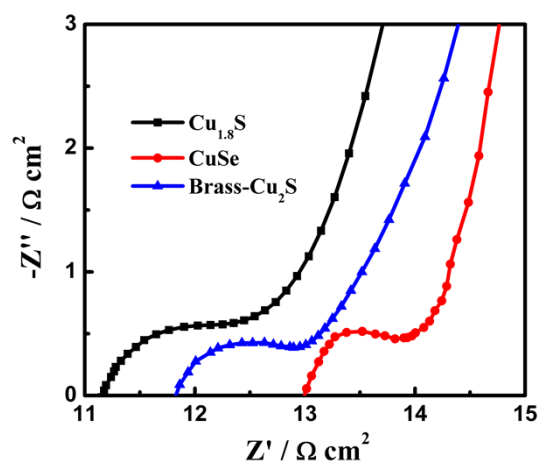

**Figure S3.** Enlarged  $R_{ct}$  part of the Nyquist plot of the integrated solar cells with three different CEs, measured in the dark under a forward bias of -0.55 V with the frequency ranging from 0.07

Hz to 100 KHz, a 5 mV ac amplitude was used.  $R_{ct}$  values obtained by fitting the spectra of the  $Cu_{1.8}S$ , CuSe, and  $Cu_2S$  CEs were  $0.8 \Omega \cdot cm^2$ ,  $0.5 \Omega \cdot cm^2$ , and  $0.6 \Omega \cdot cm^2$ , respectively.

**Table S1.** Photovoltaic Performance of the DSCs with Different CEs and the Fitted EIS Parameters of Symmetric Cells.

| Sample              | $V_{oc}/m$<br>V | $J_{sc}/mA$<br>$cm^{-2}$ | FF      | PCE/%  | Sample              | $R_s/\Omega cm^2$ | $R_{ct}/\Omega$<br>$cm^2$ | $Z_N/\Omega$<br>$cm^2$ | $\Delta E_p/m$<br>V |
|---------------------|-----------------|--------------------------|---------|--------|---------------------|-------------------|---------------------------|------------------------|---------------------|
| 1#FeSe <sub>2</sub> | 752             | 15.99                    | 0.74    | 8.90   | 1#FeSe <sub>2</sub> | 12.73             | 0.19                      | 0.25                   | 259                 |
| 2#FeSe <sub>2</sub> | 754             | 16.10                    | 0.75    | 9.10   | 2#FeSe <sub>2</sub> | 12.56             | 0.18                      | 0.24                   | 256                 |
| 3#FeSe <sub>2</sub> | 754             | 16.09                    | 0.75    | 9.10   | 3#FeSe <sub>2</sub> | 11.89             | 0.20                      | 0.27                   | 278                 |
| 4#FeSe <sub>2</sub> | 752             | 16.06                    | 0.74    | 8.94   | 4#FeSe <sub>2</sub> | 11.44             | 0.17                      | 0.23                   | 239                 |
|                     | 753±1           | 16.06±0.0                | 0.74±0. | 9.01±0 |                     | 12.15±0.          | 0.18±0.0                  | 0.25±0.0               | 258±20              |
|                     |                 | 5                        | 01      | .09    |                     | 65                | 1                         | 2                      |                     |
| 1#Pt                | 752             | 15.54                    | 0.72    | 8.41   | 1#Pt                | 12.41             | 0.72                      | 0.40                   | 344                 |
| 2#Pt                | 753             | 15.62                    | 0.73    | 8.58   | 2#Pt                | 12.00             | 0.71                      | 0.39                   | 335                 |
| 3#Pt                | 749             | 15.38                    | 0.72    | 8.29   | 3#Pt                | 10.92             | 0.73                      | 0.40                   | 340                 |
| 4#Pt                | 750             | 15.76                    | 0.71    | 8.39   | 4#Pt                | 11.95             | 0.72                      | 0.41                   | 330                 |
|                     | 751±2           | 15.58±0.2                | 0.72±0. | 8.42±0 |                     | 11.82±0.          | 0.72±0.0                  | 0.40±0.0               | 337±7               |
|                     |                 | 0                        | 01      | .13    |                     | 80                | 1                         | 1                      |                     |

**Table S2.** Comparison of the Photovoltaic Device Characteristics Measured with Representative Photoanodes from Different Batches Assembled with a FeSe<sub>2</sub> Counter Electrode.

| Sample | $V_{oc}/mV$ | $J_{sc}/mA cm^{-2}$ | FF   | PCE/% |
|--------|-------------|---------------------|------|-------|
| 1      | 753         | 16.03               | 0.74 | 8.93  |
| 2      | 754         | 16.10               | 0.73 | 8.86  |
| 3      | 754         | 15.85               | 0.74 | 8.84  |
| 4      | 753         | 16.11               | 0.74 | 8.97  |

**Table S3.** Photovoltaic Performance of the QDSCs with Different CEs and the Fitted EIS

Parameters of Symmetric Cells.

| Sample                | $V_{oc}/mV$ | $J_{sc}/mA\ cm^{-2}$ | FF        | PCE/%     | Sample                | $R_s/\Omega\ cm^2$ | $R_{ct}/\Omega\ cm^2$ |
|-----------------------|-------------|----------------------|-----------|-----------|-----------------------|--------------------|-----------------------|
| 1#Pt                  | 546         | 13.30                | 0.34      | 2.47      | 1#Pt                  | 8.9                | 414.2                 |
| 2#Pt                  | 547         | 12.81                | 0.38      | 2.66      | 2#Pt                  | 8.8                | 426.1                 |
| 3#Pt                  | 542         | 12.89                | 0.33      | 2.31      | 3#Pt                  | 8.9                | 420.3                 |
|                       | 545±3       | 13.01±0.30           | 0.35±0.03 | 2.48±0.17 |                       | 8.8±0.1            | 420.2±5.9             |
| 1#Cu <sub>1.8</sub> S | 550         | 15.00                | 0.52      | 4.29      | 1#Cu <sub>1.8</sub> S | 8.7                | 1.3                   |
| 2#Cu <sub>1.8</sub> S | 552         | 14.96                | 0.53      | 4.37      | 2#Cu <sub>1.8</sub> S | 8.9                | 1.2                   |
| 3#Cu <sub>1.8</sub> S | 549         | 14.56                | 0.54      | 4.32      | 3#Cu <sub>1.8</sub> S | 8.8                | 1.1                   |
|                       | 550±2       | 14.84±0.24           | 0.53±0.01 | 4.31±0.11 |                       | 8.8±0.1            | 1.2±0.1               |
| 1#Cu <sub>2</sub> S   | 556         | 15.30                | 0.53      | 4.51      | 1#Cu <sub>2</sub> S   | 9.1                | 0.8                   |
| 2#Cu <sub>2</sub> S   | 555         | 15.43                | 0.55      | 4.71      | 2#Cu <sub>2</sub> S   | 9.0                | 0.9                   |
| 3#Cu <sub>2</sub> S   | 560         | 15.20                | 0.54      | 4.59      | 3#Cu <sub>2</sub> S   | 9.2                | 0.9                   |
|                       | 557±3       | 15.31±0.12           | 0.54±0.01 | 4.60±0.12 |                       | 9.1±0.1            | 0.9±0.1               |
| 1#CuSe                | 562         | 15.57                | 0.55      | 4.81      | 1#CuSe                | 9.1                | 0.8                   |
| 2#CuSe                | 562         | 15.70                | 0.56      | 4.94      | 2#CuSe                | 8.7                | 0.7                   |
| 3#CuSe                | 561         | 15.62                | 0.56      | 4.91      | 3#CuSe                | 8.9                | 0.8                   |
|                       | 561±1       | 15.63±0.11           | 0.56±0.01 | 4.89±0.06 |                       | 8.9±0.2            | 0.7±0.1               |

**Table S4.** Comparison of the Photovoltaic Device Characteristics Measured with Representative Photoanodes from Different Batches Assembled with a CuSe (or Cu<sub>1.8</sub>S) Counter Electrode.

| Sample | $V_{oc}/mV$ | $J_{sc}/mA$      | FF   | PCE/% | Sample              | $V_{oc}/mV$ | $J_{sc}/mA$      | FF   | PCE/% |
|--------|-------------|------------------|------|-------|---------------------|-------------|------------------|------|-------|
| CuSe   | V           | cm <sup>-2</sup> |      |       | Cu <sub>1.8</sub> S |             | cm <sup>-2</sup> |      |       |
| 1      | 562         | 15.65            | 0.56 | 4.92  | 1                   | 551         | 14.88            | 0.53 | 4.34  |
| 2      | 561         | 15.50            | 0.56 | 4.87  | 2                   | 550         | 14.90            | 0.52 | 4.26  |
| 3      | 561         | 15.63            | 0.55 | 4.82  | 3                   | 551         | 14.63            | 0.52 | 4.19  |
| 4      | 560         | 15.71            | 0.56 | 4.92  | 4                   | 549         | 14.85            | 0.53 | 4.32  |
